# Supplementary material for: Genomic epidemiology of Mycobacterium bovis infection in sympatric badger and cattle populations in Northern Ireland
Source: PubMed Central journal article supplement (PMC10272874; doi:10.1099/mgen.0.001023), 2023-05-25
Supplement: mgen-9-1023-s001.pdf [file mgen-9-1023-s001.pdf]

1 **Supplementary Materials**

2

3

4 **Genomic epidemiology of *Mycobacterium bovis* infection in sympatric badger**  
5 **and cattle populations in Northern Ireland.**

6 Assel Akhmetova<sup>1</sup>, Jimena Guerrero<sup>2</sup>, Paul McAdam<sup>3</sup>, Liliana C.M. Salvador<sup>4</sup>, Joseph Crispell<sup>5</sup>,  
7 John Lavery<sup>6</sup>, Eleanor Presho<sup>7</sup>, Rowland R. Kao<sup>8</sup>, Roman Biek<sup>1</sup>, Fraser Menzies<sup>9</sup>, Nigel Trimble<sup>9</sup>,  
8 Roland Harwood<sup>9</sup>, P. Theo Pepler<sup>1</sup>, Katarina Oravcova<sup>1</sup>, Jordon Graham<sup>10</sup>, Robin Skuce<sup>7</sup>, Louis  
9 du Plessis<sup>11,12</sup>, Suzan Thompson<sup>7</sup>, Lorraine Wright<sup>7</sup>, Andrew W. Byrne<sup>7,13</sup>, Adrian R. Allen<sup>7</sup>.

10 1 - University of Glasgow, Glasgow, UK.

11 2 - Centro de Investigacion en Alimentacion y Desarrollo A.C., Hermosillo, Sonora, Mexico

12 3 – Fios Genomics, Edinburgh, UK.

13 4 – Department of Infectious Diseases, College of Veterinary Medicine, University of Georgia,  
14 Athens, GA, USA.

15 5 – Foreign, Commonwealth and Development Office, Glasgow, UK.

16 6 – Department for the Economy, Belfast, UK.

17 7 – Agrifood and Biosciences Institute, Belfast, UK.

18 8 - University of Edinburgh, Roslin Institute, Edinburgh, UK.

19 9 – Department of Agriculture, Environment and Rural Affairs (DAERA), Belfast, UK.

20 10 – Farmvet Systems Ltd, Moneymore, UK.

21 11 – Dept. Biosystems Science and Engineering, ETH Zurich, Basel, Switzerland.

22 12 – Swiss Institute of Bioinformatics, Lausanne, Switzerland.

23 13 – Department of Agriculture Food and the Marine (DAFM), Dublin, Ireland.

24

25

26

27

28

29

30

31

32

33

34

35

36

37

38

39

40

41

42 **Supplementary Tables**

43

| Year             | N   | Mean Na | Mean He | Mean Ho | Mean Fis | Mean AR |
|------------------|-----|---------|---------|---------|----------|---------|
| 2014             | 273 | 4.9     | 0.52    | 0.49    | 0.06     | 4.77    |
| 2015             | 152 | 5.0     | 0.51    | 0.49    | 0.04     | 4.81    |
| 2016             | 97  | 4.6     | 0.52    | 0.50    | 0.04     | 4.53    |
| 2017             | 113 | 5.1     | 0.52    | 0.48    | 0.09     | 5.05    |
| 2018             | 134 | 4.8     | 0.51    | 0.49    | 0.04     | 4.73    |
| <b>ALL YEARS</b> | 769 | 4.9     | 0.52    | 0.49    | 0.05     | 4.78    |

44 **Table S1** – Badger meta population genetic summary statistics averaged across 14  
 45 microsatellite loci. N = no. of animals genotyped successfully; Na = no. of alleles observed  
 46 per locus; He = expected heterozygosity; Ho = observed heterozygosity; Fis = fixation index  
 47 (level of inbreeding per locus); AR = Allelic richness.

48

|                                        | tMRCA (yrs before 2017) | 95% HPD   |
|----------------------------------------|-------------------------|-----------|
| <b>Skyline strict clock</b>            | 32.4                    | 31.0-36.8 |
| <b>Skyline relaxed clock</b>           | 32.3                    | 31.0-36.8 |
| <b>Simple coalescent strict clock</b>  | 41.9                    | 33.3-52.8 |
| <b>Simple coalescent relaxed clock</b> | 45.7                    | 32.0-72.3 |

49 **Table S2** – Endemic clade time to most recent common ancestor (tMRCA) for strict and  
 50 relaxed clock variants of the skyline and simple constant population coalescent phylogenetic  
 51 models.

52

| Model            | Log Marginal Likelihood (ML) | SD   | Bayes factor (BF) | $2\sqrt{SD_2^2 + SD_1^2}$ | Model comparison |
|------------------|------------------------------|------|-------------------|---------------------------|------------------|
| Strict constant  | -7266.61                     | 5.13 |                   |                           | Strict skyline   |
| Strict skyline   | -7258.94                     | 5.13 | 7.67              | 14.51                     | Strict constant  |
| Relaxed constant | -7745.35                     | 5.1  |                   |                           | Relaxed skyline  |
| Relaxed skyline  | -7696.13                     | 4.75 | 49.22             | 13.94                     | Relaxed constant |

53

54 **Table S3** – Strict and relaxed clock, skyline and constant population model outputs. Log  
 55 Marginal Likelihoods and standard deviation (SD). Bayes factor (BF) = logML model 2 –  
 56 logML model1.  $2\sqrt{SD_{model2}^2 + SD_{model1}^2}$  is calculated from the standard deviations of both  
 57 models being compared.

58 Provided it exceeds the figure calculated for  $2\sqrt{SD_{model2}^2 + SD_{model1}^2}$ , BF of 3-20 is positive  
 59 support for 2<sup>nd</sup> model being superior & BF of 20-150 is strong support as per Kass and  
 60 Rafferty, 1995 [60].

61 **Supplementary Figures**  
 62

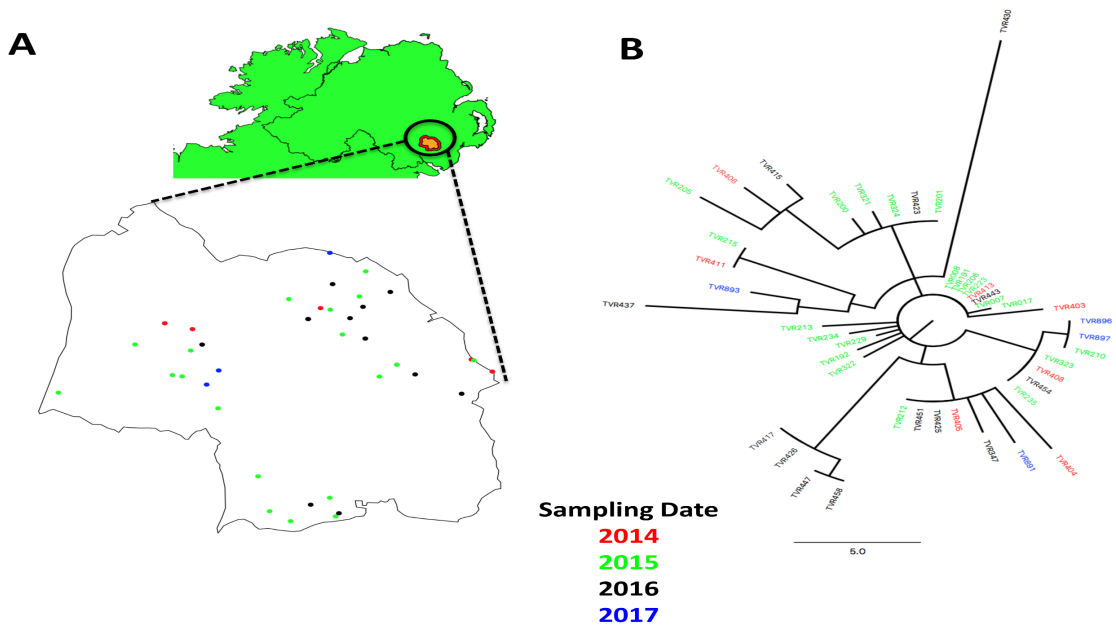

63  
 64 **Supplementary Figure S1** – A: Locations of 45 *M. bovis* culture positive badgers by year. B:  
 65 Maximum likelihood phylogeny of 45 *M. bovis* endemic lineage isolates from TB positive  
 66 badgers.

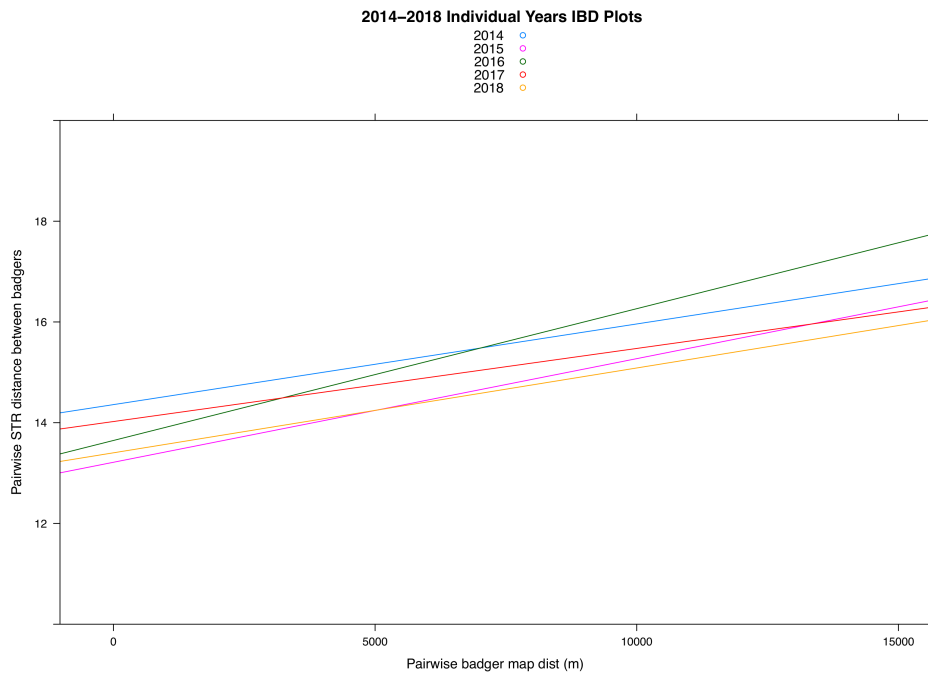

67  
 68 **Figure S2** - Linear regressions of badger IBD relationships – pairwise microsatellite / STR  
 69 genetic distance vs Euclidean distance for all capture years.  
 70

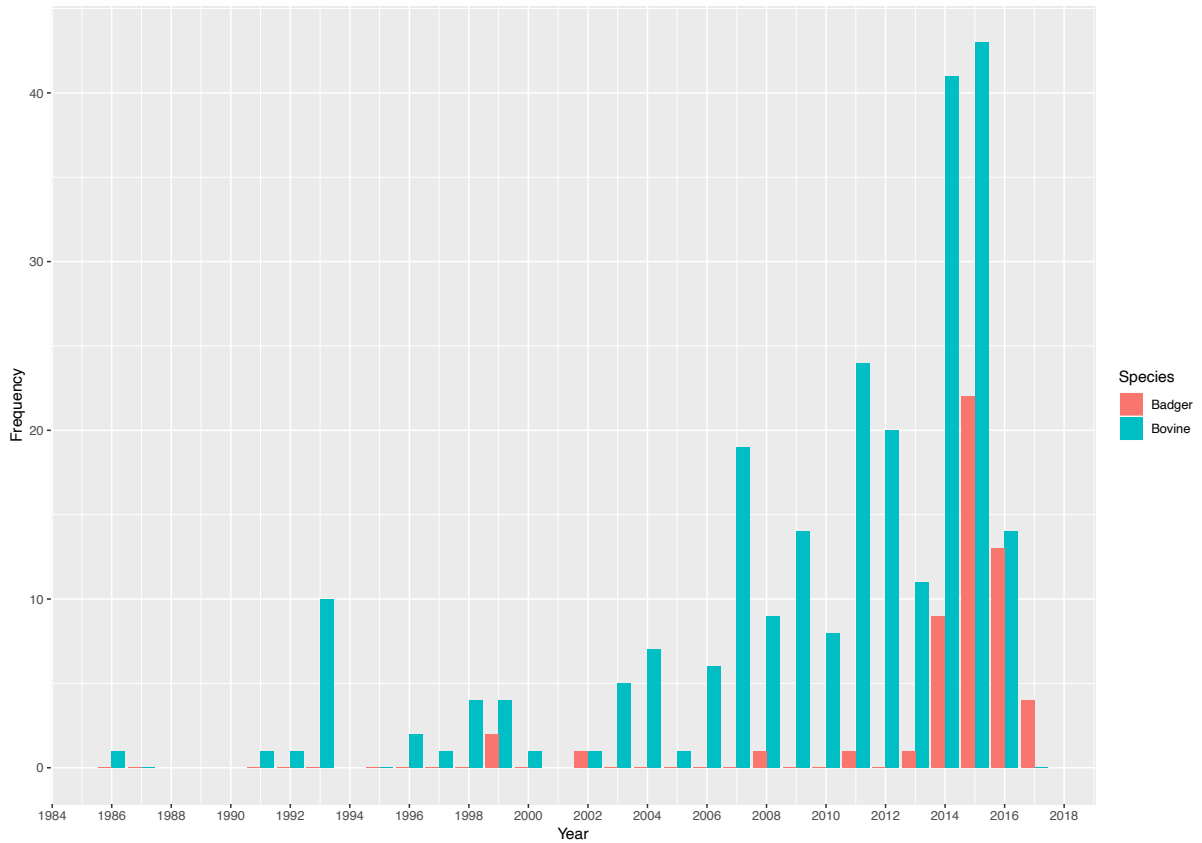

71  
72  
73  
74  
75  
76

**Supplementary Figure S3** – Sampling frequency across all years by host for endemic 6.263 lineage.

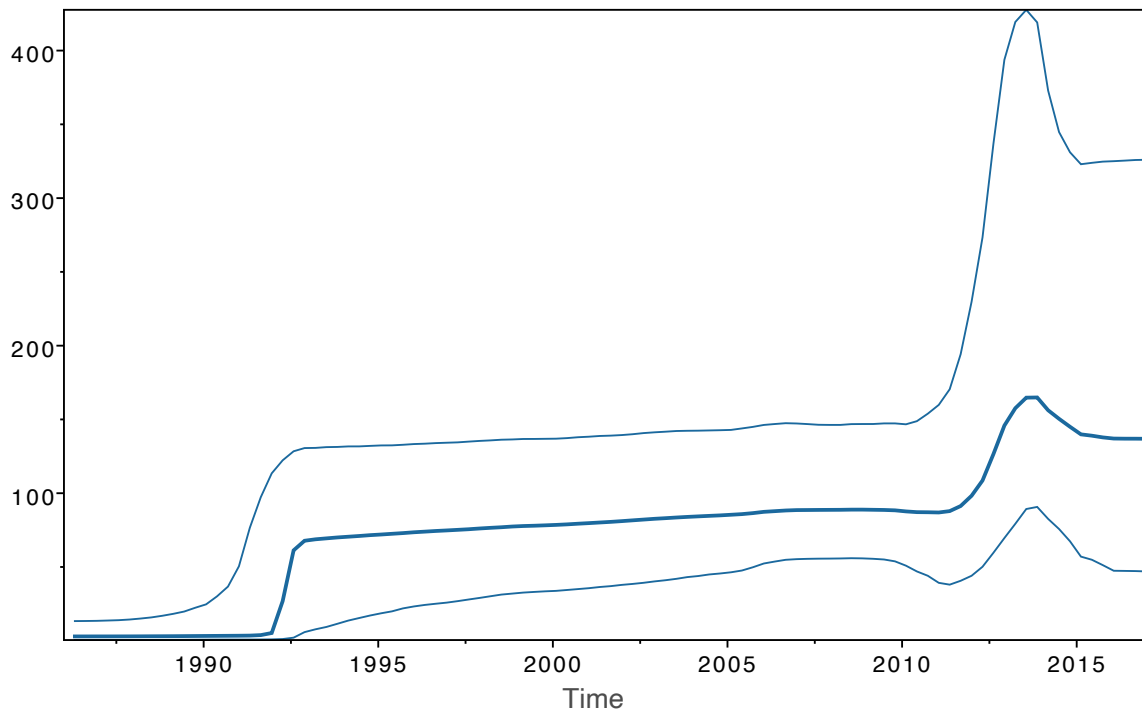

77  
78  
79

**Supplementary Figure S4** - Skyline effective population size of the endemic clade through time plot for the strict clock model.

80

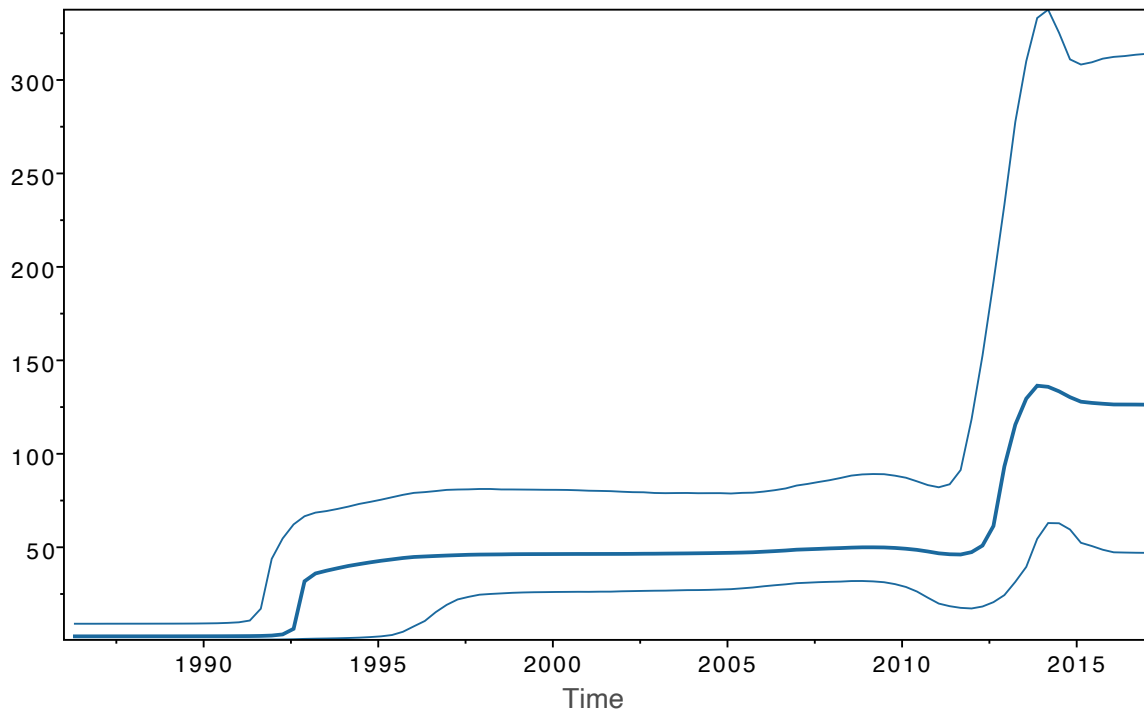

81

82

**Supplementary Figure S5** – Skyline effective population size of the endemic clade through time plot for the relaxed clock model.

83

84

85

86

87

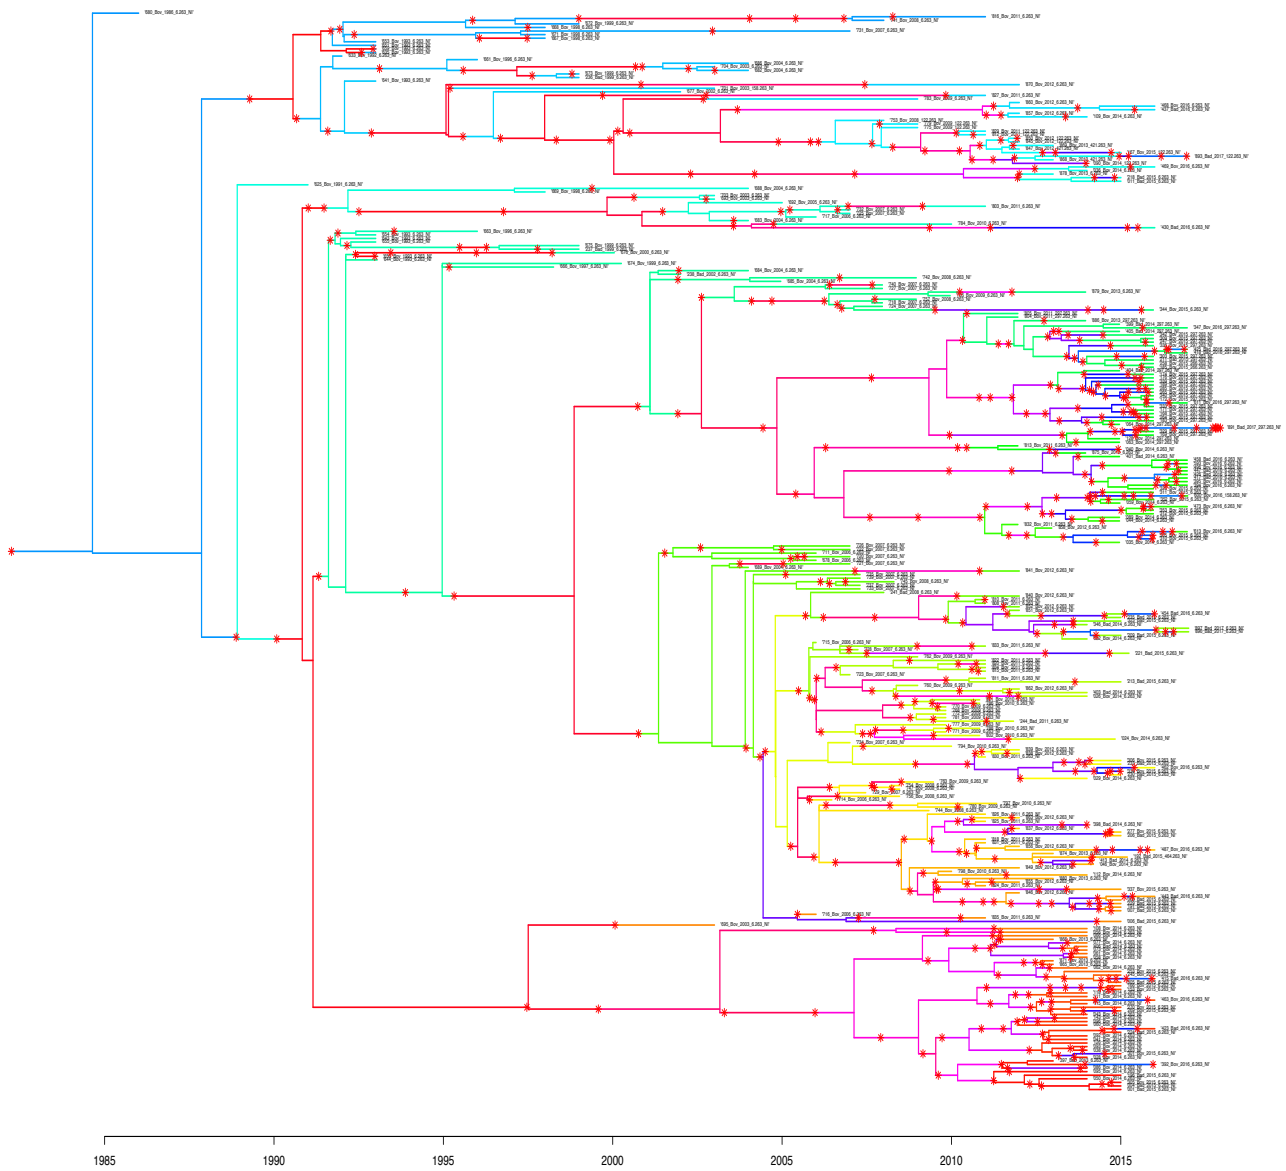

88  
 89  
 90  
 91  
 92  
 93  
 94

**Supplementary Figure S6** – Transphylo medoid transmission tree of the endemic clade for the strict clock model. Branch colour changes and red stars indicate inferred host change events.

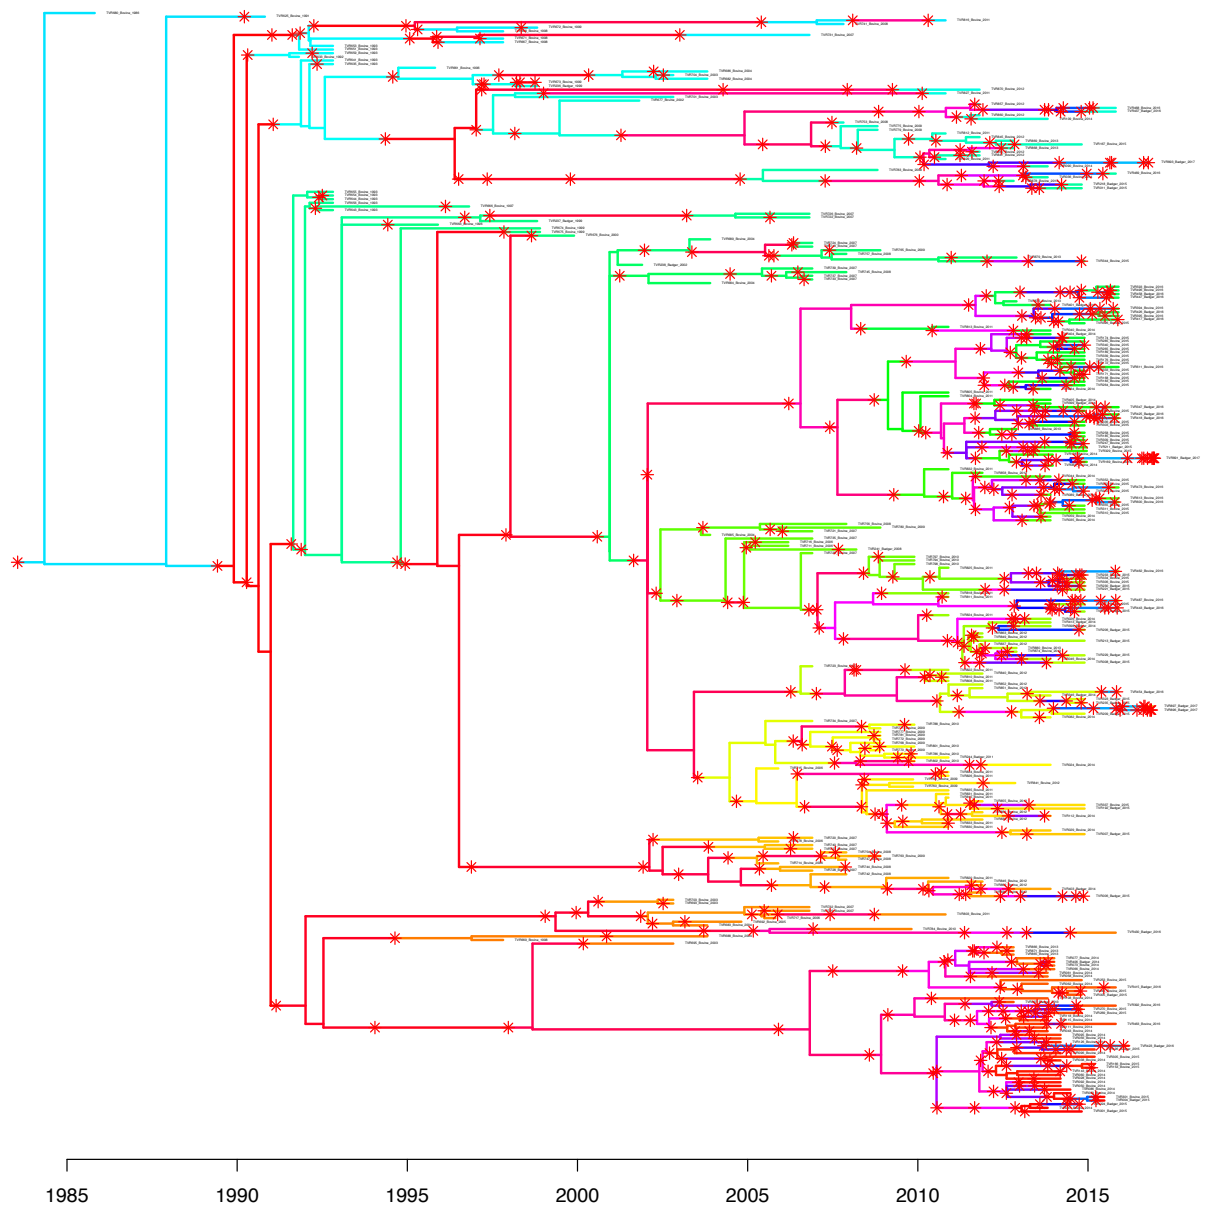

95  
 96  
 97  
 98  
 99  
 100  
 101  
 102  
 103  
 104  
 105  
 106

**Supplementary Figure S7** – Transphylo medoid transmission tree of the endemic clade for the relaxed clock model. Branch colour changes and red stars indicate inferred host change events.

**A**

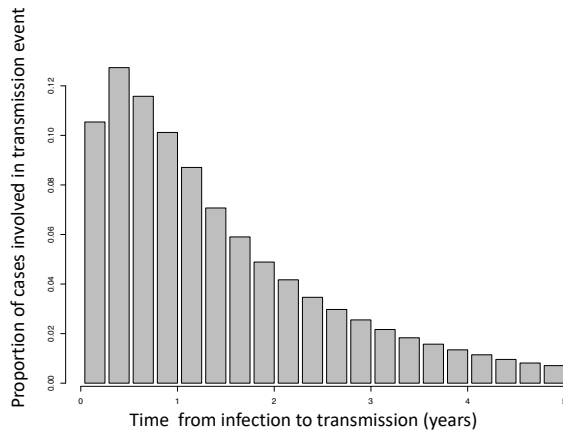

**B**

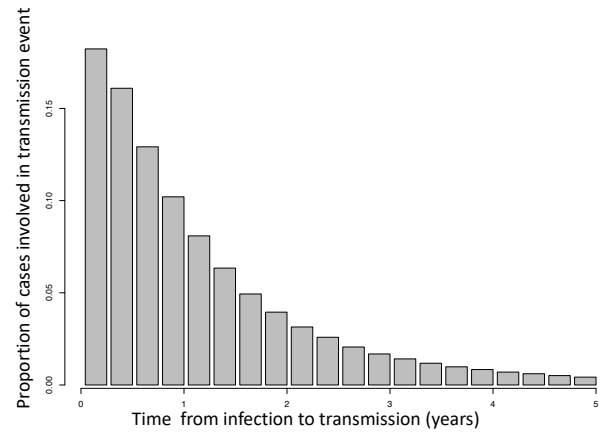

108

109

**Supplementary Figure S8** – Transphylo distribution of time from infection to transmission (generation time) for **A**: strict clock model, **B**: relaxed clock model.

110

111

112

113

114

115

116

117

118

119

120

121

122

123

124

125

126

127

128

129

130

131

132

133

134

135



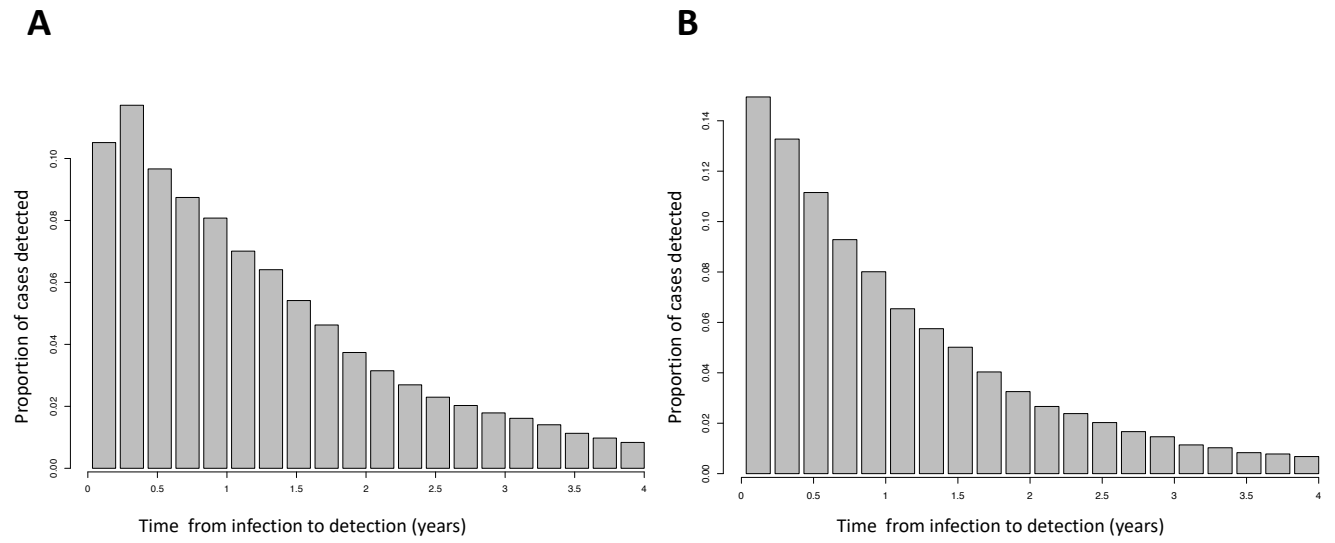

137

138

**Supplementary Figure S9 –** Transphylo distribution of time from infection to detection for

139

**A:** strict clock model, **B:** relaxed clock model.

140

141

142

143

144

145

146

147

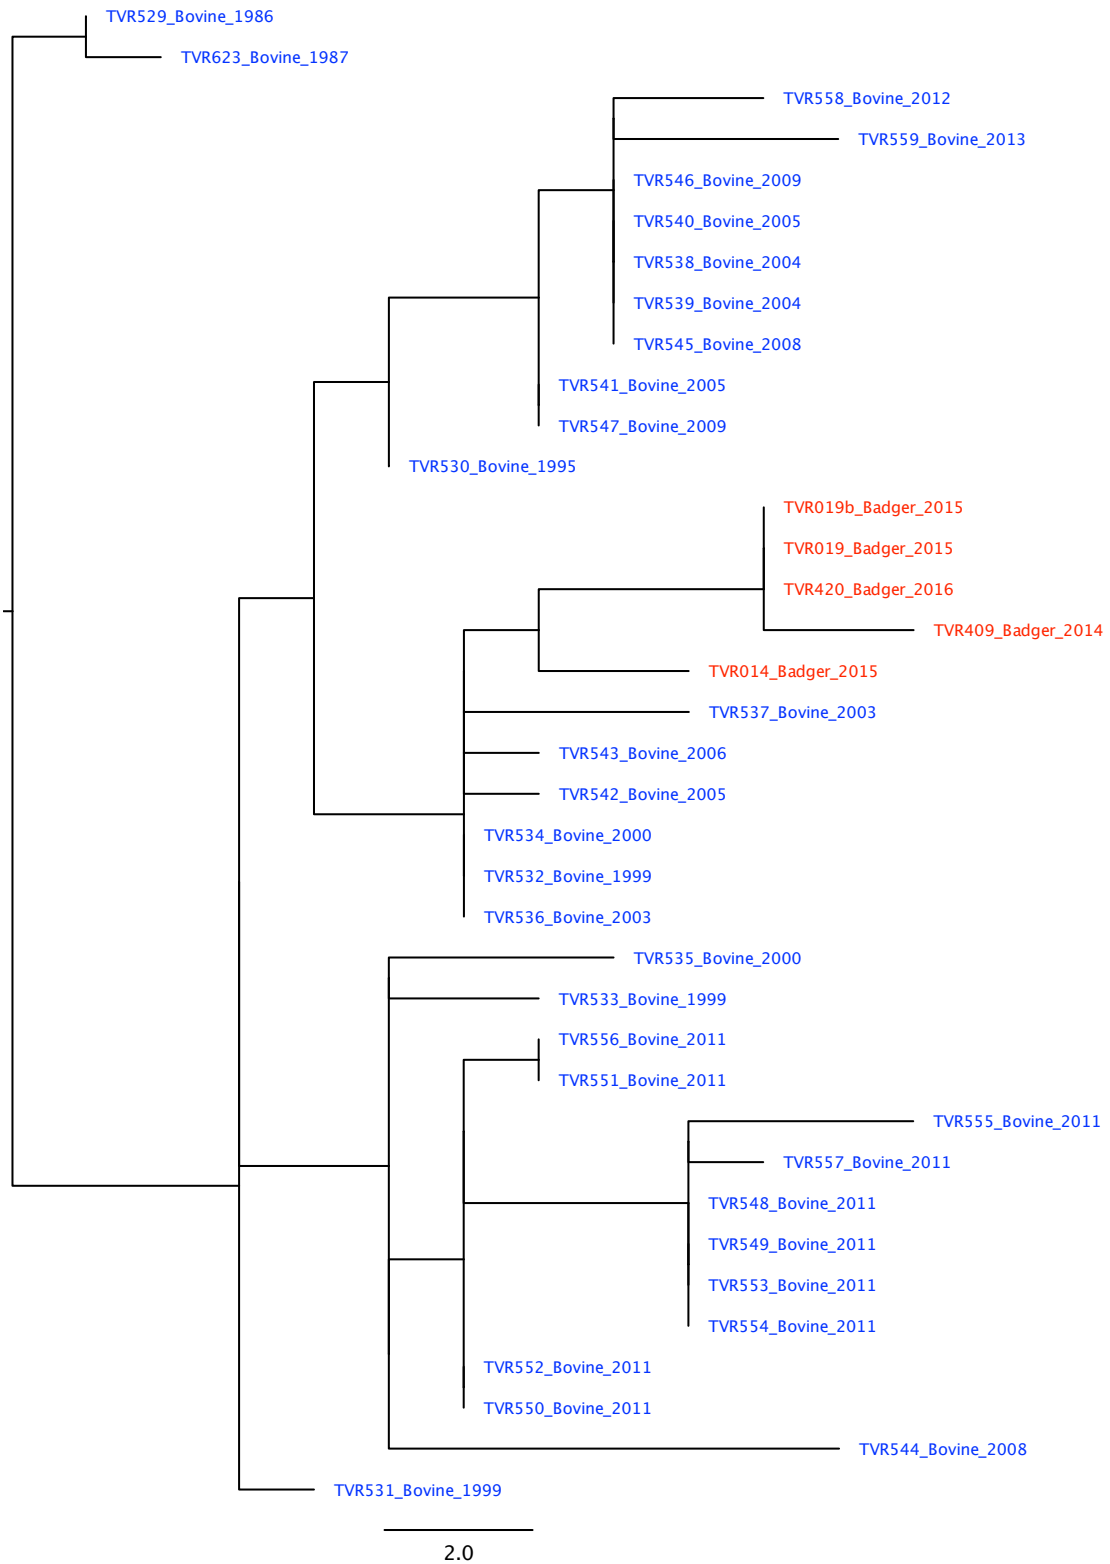

148  
 149  
 150  
 151  
 152

**Supplementary Figure S10** - Maximum likelihood phylogeny (53 SNPs) of non-endemic lineage 20.131.

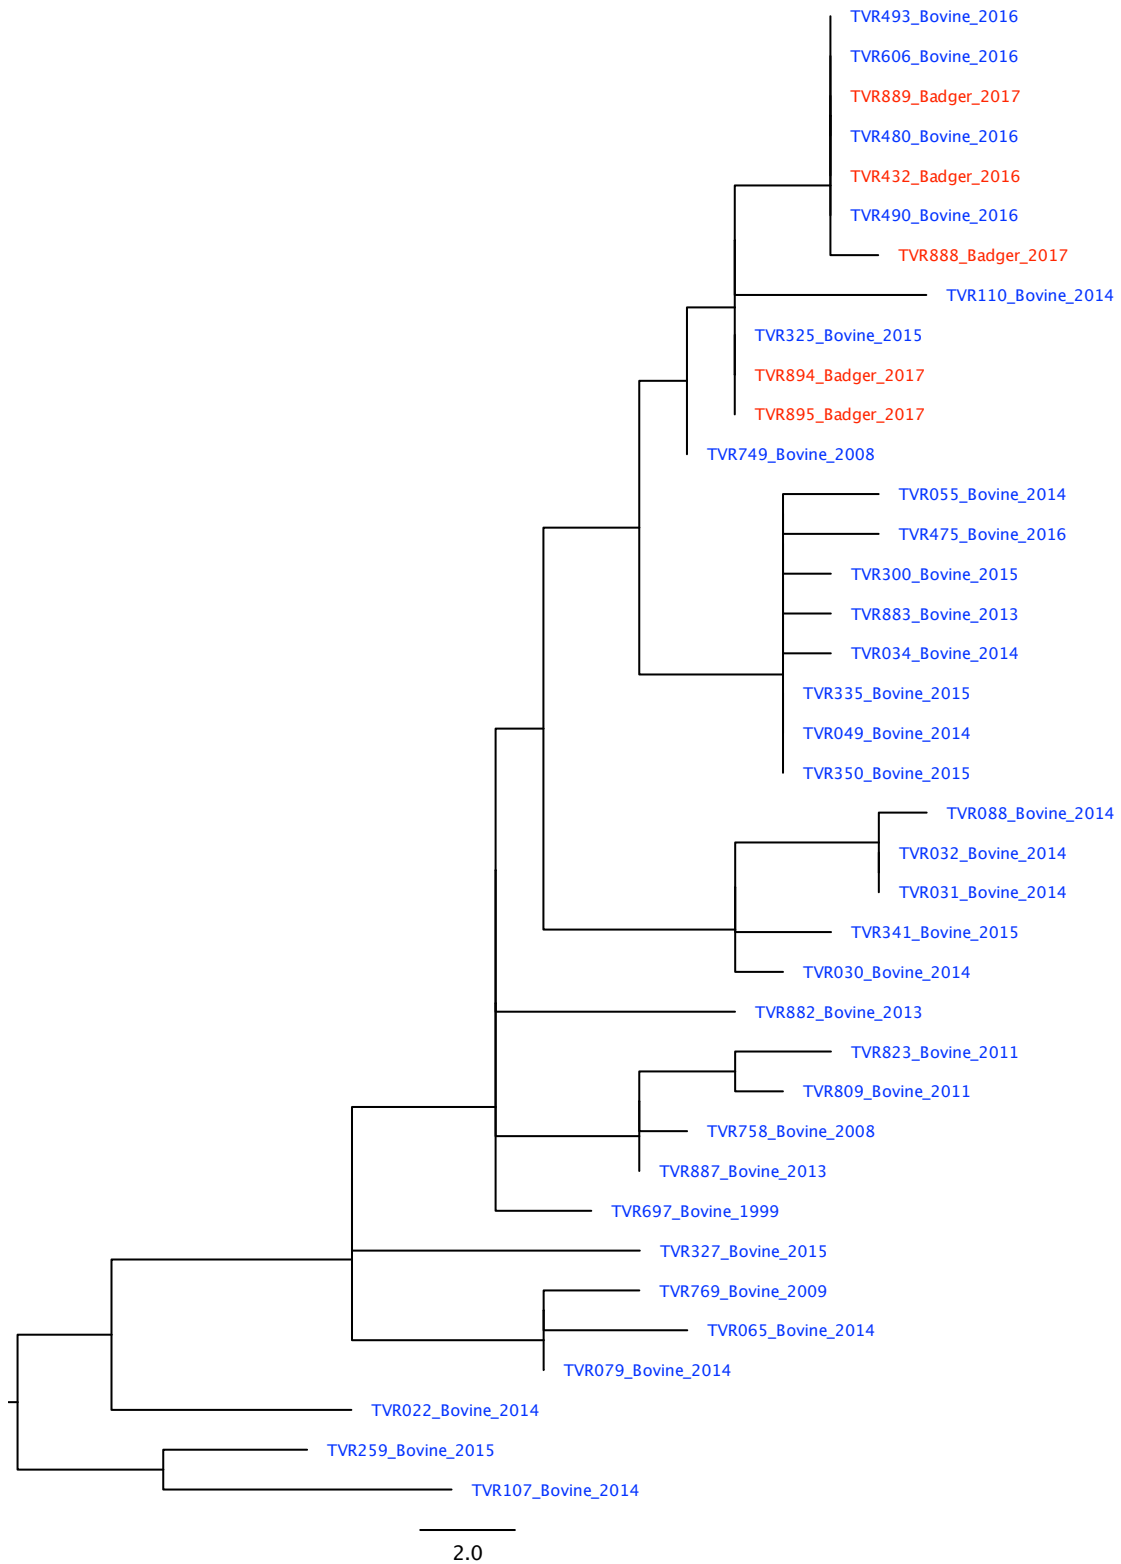

153  
154  
155  
156  
157

**Supplementary Figure S11** – Maximum likelihood phylogeny (92 SNPs) of non-endemic lineage 4.140.

158

## 159 **Supplementary Text**

160

### 161 **Utility of WGS for bovine TB surveillance.**

162 Our data are consistent with the findings that WGS provides unparalleled resolution for  
163 epidemiological investigations of zoonotic disease [1] – indexing additional pathogen  
164 variation to stratify isolates that are homogeneous according to the classical tuberculosis  
165 molecular epidemiological tools of spoligotyping and MLVA [2-3].

166

167 Regarding the latter tools, we find perfect congruence between spoligotype and MLVA data  
168 and the basal nodes defining major lineages of the phylogeny for all isolates from the TVR  
169 region (main text Figure 2). This concordance is a testament to the clonality of *M. bovis* [4-5]  
170 and is indicative that existing databases of classical molecular markers, can be used to target  
171 ‘hotspots’ of persistent, endemic infection for closer investigation using WGS.

172

173 Contemporary transmission of slowly evolving pathogens, such as members of the  
174 *Mycobacterium tuberculosis complex* (MTBC), is typically characterised by little within-clade  
175 diversity and resulting reduced SNP distances / phylogenetic branch lengths between isolates  
176 [6]. Previous studies have suggested various minimal SNP distance thresholds, for the  
177 definition of contemporaneous, epidemiologically linked isolates. Five and twelve SNP  
178 distances have been proposed to be consistent with such transmission clusters in *M.*  
179 *tuberculosis* outbreaks in the United Kingdom [7], whilst ten SNP thresholds have been  
180 proposed in other studies with *M. tuberculosis* and *M. bovis* [8-12]. Meehan et al (2018) [6]  
181 have observed that in *M. tuberculosis*, SNP distances between one and five can represent  
182 transmission events up to 10 years apart. Given that MTBC evolution appears to consistently  
183 involve relaxed molecular clock like behaviour across lineages [12-14], it is perhaps not  
184 surprising that selecting a definitive threshold for contemporary transmission is difficult, and  
185 as a result, those set can appear arbitrary. In addition to the issues with relative clock like  
186 behaviour of different *M. bovis* lineages, intensity of sample collection and representation of  
187 multiple time points can be crucial to establishing robust substitution rates [1]. The general  
188 rule of thumb remains however - the shorter the SNP distance between isolates, the more  
189 likely they are more closely epidemiologically linked. In this study, the lineage we know to be  
190 endemic in the study area from years of MLVA surveillance, exhibits the shortest average  
191 pairwise SNP distance between isolates (7.6 s.d.  $\pm 4.0$  – see Table 1), which is likely indicative  
192 of contemporary transmission in the region, and compares favourably to the thresholds  
193 discussed above.

194

195 The advantage that WGS will provide in disease tracing compared to historical molecular  
196 epidemiology methods in the *M. bovis* epi-system, is that outbreaks can be traced back to  
197 higher resolution, WGS-defined lineages and sequence types, found in more precise locations  
198 than those defined by genetically homogeneous, MLVA home ranges that can cover  
199 substantial geographical areas [2-3]. A recent and pertinent example of this, is an outbreak  
200 from Cumbria in northwest England, which genome sequencing revealed was linked to the  
201 outbreak area under study here [15].

202

203

204 **Monitoring of non-endemic lineages**

205 Sequence data are useful for identifying probable incursions of non-endemic disease lineages  
206 into new areas, and for potentially determining if the incursion results in contemporary  
207 transmission and persistence. Intra-lineage, inter-isolate SNP distances greater than that  
208 observed for the endemic 6.263 lineage, are possibly indicative of a lack of contemporary  
209 transmission, likely associated with lineages which are non-endemic in the study region as per  
210 previous observations from Northern Ireland wide molecular epidemiological surveillance [2-  
211 3]. This certainly appears to hold true for lineages 1.140, 2.142 and 3.140, which exhibit  
212 average pairwise inter-isolate distances of between 17.6 and 21.6 SNPs. Lineages 5.140 and  
213 19.140 are only represented by two isolates each, but for both lineages, inter-isolate  
214 distances are again observed to be larger than the endemic lineage at 79 SNPs and 13 SNPs  
215 respectively. Given this observation, and the fact that we know these five lineages are outside  
216 of their MLVA defined home ranges [3], it seems probable that they could have arrived in the  
217 study area through multiple, long distance, cattle movements. It is noteworthy, but  
218 anecdotal, that these lineages are comprised solely of isolates from cattle, suggestive perhaps  
219 that the lack of contemporary transmission for these incursive strains has resulted in no  
220 infection reaching the wildlife population. However, with deficiencies in sampling, badger  
221 'trappability' and TB test diagnostics as discussed in the supplementary materials, one cannot  
222 be definitive that a non-endemic, visiting pathogen lineage has not established a focus of  
223 infection in the study area. Only continued surveillance over a wider temporal window could  
224 assess that. The establishment of long-term genome-based surveillance systems could in the  
225 future help to inform on successful incursions (Gardy and Loman, 2018) [16].

226  
227 The 20.131 lineage exhibits mean inter-isolate SNP distances which are comparable to that of  
228 the endemic 6.263 lineage (main text Table 1). However, only four isolates of this lineage,  
229 from two badgers (See Supplementary Figure S10), were found within the study area, with  
230 the majority sampled from a neighbouring region in which this strain has a focus of infection.  
231 The short inter-isolate distances observed are therefore more likely to be consistent with  
232 contemporary transmission in the neighbouring region. It is noteworthy however that the  
233 two badgers sampled for this lineage and found in the study zone were found in isolation,  
234 with no associated, contemporary, study zone cattle isolates. It could be that badgers have  
235 dispersed from the neighbouring region into the study zone, carrying infection with them,  
236 which has yet to appear in the cattle population. However, it is also possible that an  
237 undetected reservoir of cattle may have entered the study zone and transmitted infection to  
238 local badgers. Alternatively, an undetected reservoir not picked up by sampling could be  
239 residing within the zone. With so few isolates of the 20.131 lineage from within the study  
240 area, and the previously mentioned biases in sampling, it is impossible to be definitive. Again,  
241 detailed, longitudinal, genome facilitated surveillance would perhaps be able to inform more  
242 fully on this incursive lineage in this region.

243  
244 Interestingly, one of the historically non-endemic lineages (4.140) [3], does appear to be  
245 persisting in the TVR zone, with multiple badger-sourced isolates observed to exhibit shorter  
246 inter-isolate SNP distances (0-1) between each-other and cattle from the area  
247 (Supplementary Figure S11), consistent with more contemporary transmission events. The  
248 latter observation does highlight the usefulness of this WGS based approach for on-going  
249 surveillance, and for detecting incursions that establish new foci in new regions. It seems  
250 most probable from this case, that new foci of non-endemic lineages are introduced by cattle

251 movements, with subsequent spill-over to badgers. A similar chain of events has been  
252 described for the RBCT area by van Tonder et al (2021) [17].

253

## 254 References

255

- 256 1. Kao RR, Price-Carter M, Robbe-Austerman S. Use of genomics to track  
257 bovine tuberculosis transmission. *Rev Sci Tech* 2016;35(1):241-258.
- 258 2. Skuce RA, Mallon TR, McCormick C, McBride SH, Clarke G et al.  
259 *Mycobacterium bovis* genotypes in Northern Ireland: herd-level  
260 surveillance (2003-2008). *Vet Rec* 2010;167(18):684-689
- 261 3. Skuce R, Breadon E, Allen A, Milne G, McCormick C et al. Longitudinal  
262 dynamics of herd-level *Mycobacterium bovis* MLVA type surveillance in  
263 cattle in Northern Ireland 2003-2016. *Infect Genet Evol*: 2020;79:104131.
- 264 4. Smith NH, Gordon SV, de la Rua-Domenech R, Clifton-Hadley RS,  
265 Hewinson RG. Bottlenecks and broomsticks: the molecular evolution of  
266 *Mycobacterium bovis*. *Nat Rev Microbiol* 2006;4(9):670-681.
- 267 5. Allen AR, Dale J, McCormick C, Mallon TR, Costello E et al. The phylogeny  
268 and population structure of *Mycobacterium bovis* in the British Isles.  
269 *Infect Genet Evol* 2013;20:8-15.
- 270 6. Meehan CJ, Moris P, Kohl TA, Pečerska J, Akter S et al. The relationship  
271 between transmission time and clustering methods in *Mycobacterium*  
272 *tuberculosis* epidemiology. *EBioMedicine* 2018;37:410-416.
- 273 7. Walker TM, Ip CL, Harrell RH, Evans JT, Kapatai G et al. Whole-genome  
274 sequencing to delineate *Mycobacterium tuberculosis* outbreaks: a  
275 retrospective observational study. *Lancet Infect Dis* 2013;13(2):137-146.
- 276 8. Bryant JM, Schürch AC, van Deutekom H, Harris SR, de Beer JL et al.  
277 Inferring patient to patient transmission of *Mycobacterium tuberculosis*  
278 from whole genome sequencing data. *BMC Infect Dis* 2013;13:110.
- 279 9. Roetzer A, Diel R, Kohl TA, Rückert C, Nübel U et al. Whole genome  
280 sequencing versus traditional genotyping for investigation of a  
281 *Mycobacterium tuberculosis* outbreak: a longitudinal molecular  
282 epidemiological study. *PLoS Med* 2013;10(2):e1001387.
- 283 10. Yang C, Luo T, Shen X, Wu J, Gan M et al. Transmission of multidrug-  
284 resistant *Mycobacterium tuberculosis* in Shanghai, China: a retrospective  
285 observational study using whole-genome sequencing and  
286 epidemiological investigation. *Lancet Infect Dis* 2017;17(3):275-284.
- 287 11. Jajou R, de Neeling A, van Hunen R, de Vries G, Schimmel H et al.  
288 Epidemiological links between tuberculosis cases identified twice as  
289 efficiently by whole genome sequencing than conventional molecular  
290 typing: A population-based study. *PLoS One* 2018;13(4):e0195413.

- 291 12. Crispell J, Benton CH, Balaz D, De Maio N, Ahkmetova A et al. Combining  
292 genomics and epidemiology to analyse bi-directional transmission of  
293 *Mycobacterium bovis* in a multi-host system. *Elife* 2019;8.
- 294 13. Crispell J, Zadoks RN, Harris SR, Paterson B, Collins DM et al. Using whole  
295 genome sequencing to investigate transmission in a multi-host system:  
296 bovine tuberculosis in New Zealand. *BMC Genomics* 2017;18(1):180.
- 297 14. Menardo F, Duchêne S, Brites D, Gagneux S. The molecular clock of  
298 *Mycobacterium tuberculosis*. *PLoS Pathog* 2019;15(9):e1008067.
- 299 15. Rossi G, Crispell, J., Brough, T., Lycett, S.J., White, P.C.L., Allen, A., Ellis,  
300 R.J., Gordon, S.V., Harwood, R., Palkopoulou, E., Presho, E., Skuce, R.,  
301 Smith, G.C., Kao, R.R. Phylodynamic analysis of an emergent  
302 *Mycobacterium bovis* outbreak in an area with no previous wildlife  
303 infections. *J Appl Ecol* 2021;59(1):210-222.
- 304 16. Gardy JL, Loman NJ. Towards a genomics-informed, real-time, global  
305 pathogen surveillance system. *Nat Rev Genetics* 2018;19(1):9-20.
- 306 17. van Tonder AJ, Thornton MJ, Conlan AJK, Jolley KA, Goolding L et al.  
307 Inferring *Mycobacterium bovis* transmission between cattle and badgers  
308 using isolates from the Randomised Badger Culling Trial. *PLoS Pathog*  
309 2021;17(11):e1010075.
